# Supplementary material
Source: PubMed Central journal article supplement (PMC7817469)

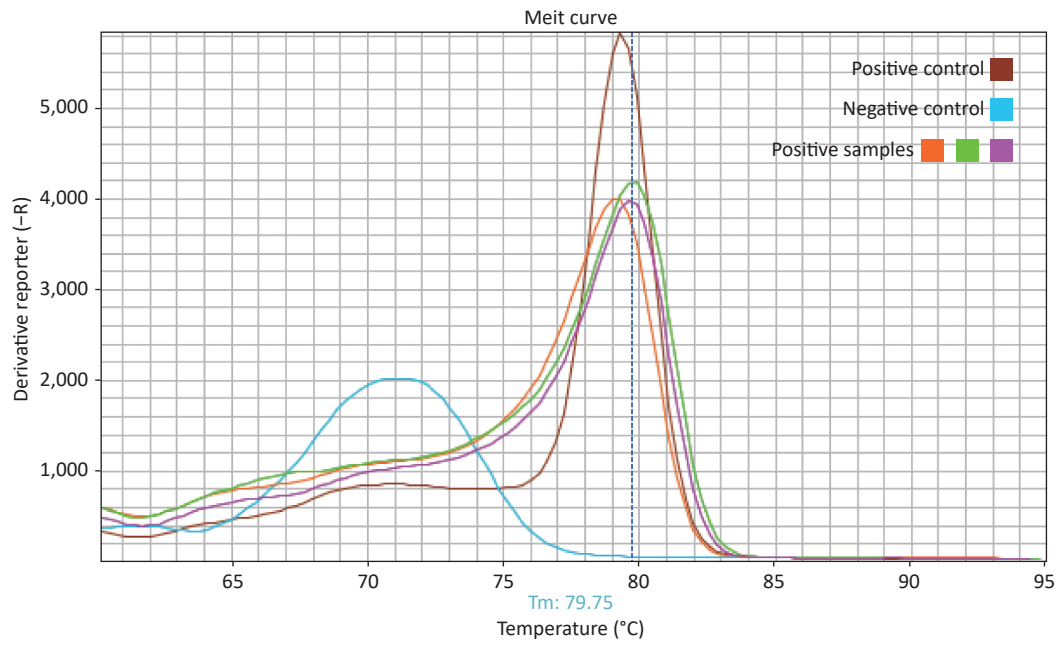

**Supplementary Figure S1.** Melt curve analysis of positive samples (RdRp gene).

Supplement: mmc1.pdf [file mmc1.pdf]
